# Supplementary material for: Effect of liver fibrosis on survival in patients with intrahepatic cholangiocarcinoma: a SEER population-based study
Source: PubMed Central journal article supplement (PMC7720776; doi:10.18632/oncotarget.27820), 2020-11-24
Supplement: oncotarget-11-4438-s001.pdf [file oncotarget-11-4438-s001.pdf]

## Effect of liver fibrosis on survival in patients with intrahepatic cholangiocarcinoma: a SEER population-based study

### SUPPLEMENTARY MATERIALS

**Supplementary Table 1: Comparison of patient characteristics between patients with a calculated fibrosis score and those without**

|                                      | level                       | With fibrosis score | Without fibrosis score | <i>p</i> | SMD  |
|--------------------------------------|-----------------------------|---------------------|------------------------|----------|------|
| <i>n</i>                             |                             | 512                 | 3552                   |          |      |
| Age at diagnosis (years) (mean (SD)) |                             | 63.42 (11.17)       | 64.30 (12.51)          | 0.13     | 0.08 |
| Gender (%)                           | Male                        | 278 (54.3)          | 1762 (49.6)            | 0.05     | 0.09 |
|                                      | Female                      | 234 (45.7)          | 1790 (50.4)            |          |      |
| Ethnicity (%)                        | White                       | 390 (76.2)          | 2709 (76.3)            | 0.57     | 0.05 |
|                                      | Black                       | 38 (7.4)            | 304 (8.6)              |          |      |
|                                      | Other                       | 84 (16.4)           | 539 (15.2)             |          |      |
| Year of diagnosis (mean (SD))        |                             | 2011.37 (3.08)      | 2010.92 (3.34)         | 0        | 0.14 |
| AFP (%)                              | Negative/normal             | 262 (73.0)          | 1215 (71.1)            | 0.51     | 0.04 |
|                                      | Positive/elevated           | 97 (27.0)           | 494 (28.9)             |          |      |
| Pathologic grade (%)                 | well_differentiated         | 36 (20.0)           | 157 (17.6)             | 0.52     | 0.06 |
|                                      | moderately_differentiated   | 144 (80.0)          | 734 (82.4)             |          |      |
| AJCC stage (%)                       | I                           | 152 (29.7)          | 611 (17.2)             | < 0.001  | 0.38 |
|                                      | II                          | 47 (9.2)            | 249 (7.0)              |          |      |
|                                      | III                         | 148 (28.9)          | 956 (26.9)             |          |      |
|                                      | IV                          | 165 (32.2)          | 1736 (48.9)            |          |      |
| SEER spread summary (%)              | Localized                   | 193 (37.7)          | 777 (21.9)             | < 0.001  | 0.36 |
|                                      | Regional - direct extension | 53 (10.4)           | 413 (11.6)             |          |      |
|                                      | Regional - lymph nodes      | 40 (7.8)            | 290 (8.2)              |          |      |
|                                      | Regional - DEandLN          | 24 (4.7)            | 171 (4.8)              |          |      |
|                                      | Distant                     | 202 (39.5)          | 1901 (53.5)            |          |      |
| Surgery (%)                          | None                        | 308 (60.2)          | 2788 (78.5)            | < 0.001  | 0.41 |
|                                      | Liver_transplantation       | 10 (2.0)            | 18 (0.5)               |          |      |
|                                      | Surgical_Resection          | 174 (34.0)          | 689 (19.4)             |          |      |
|                                      | Tumor_destruction           | 20 (3.9)            | 57 (1.6)               |          |      |
